# Supplementary material for: Multiwalled carbon nanotube@a-C@Co9S8nanocomposites: a high-capacity and long-life anode material for advanced lithium ion batteries
Source: Royal Society of Chemistry journal article supplement (doi:10.1039/c4nr07143c), 2015-01-01
Supplement: c4nr07143c1.pdf [file c4nr07143c1.pdf]

*Supporting information*

**Multiwalled Carbon Nanotube@*a*-C@Co<sub>9</sub>S<sub>8</sub> Nanocomposites: a  
High-Capacity and Long-Life Anode Material for Advanced  
Lithium Ion Batteries**

Yanli Zhou, Dong Yan, Huayun Xu, Shuo Liu, Jian Yang\*, Yitai Qian\*

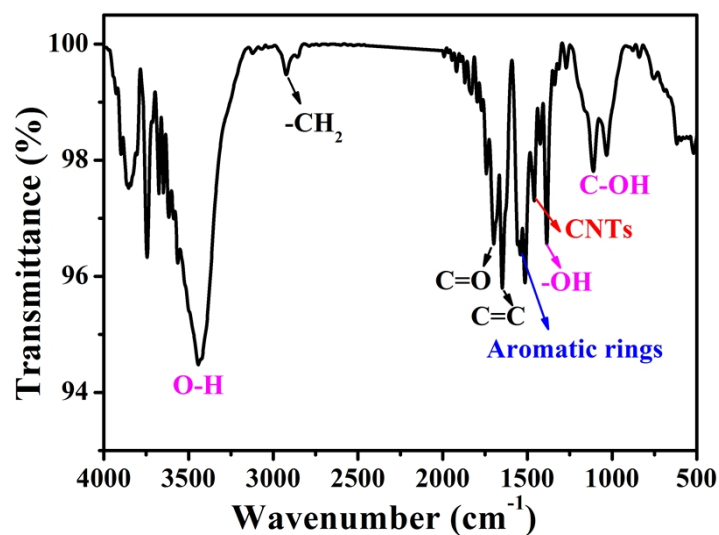

**Fig. S1** Infrared spectrum (IR) of the product obtained by treating MWCNTs with glucose via a hydrothermal process.

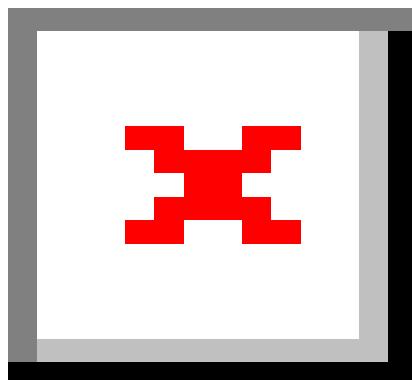

**Fig. S2** (a-d) TEM images of the product obtained by treating MWCNTs with different amounts of glucose via a hydrothermal process. (a) 0.01 g/mL, (b) 0.014g/mL, (c) 0.02 g/mL, and (d) 0.04g/mL.

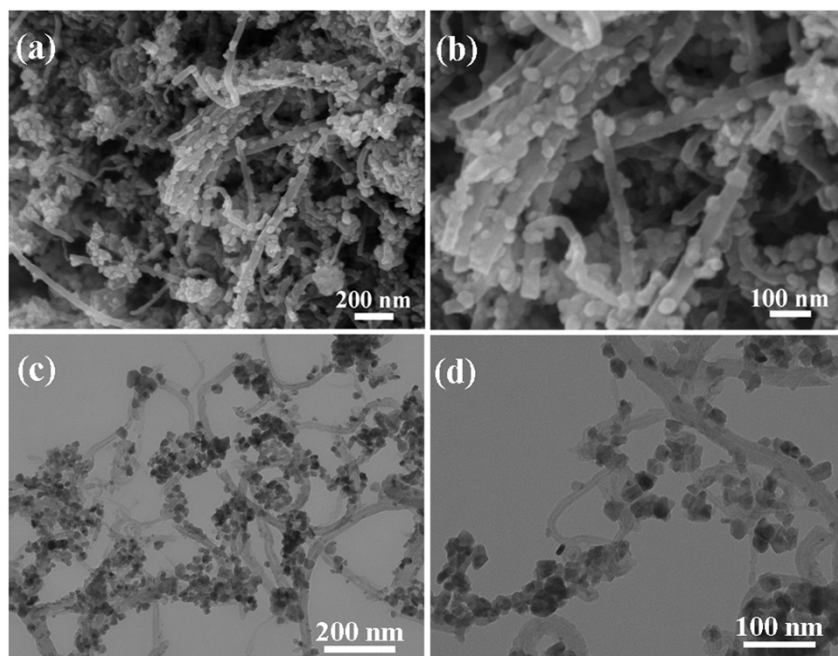

**Fig. S3** (a,b) SEM images, and (c,d) TEM images of the product obtained after the solvothermal reaction between thiourea and  $\text{Co}(\text{Ac})_2$ .

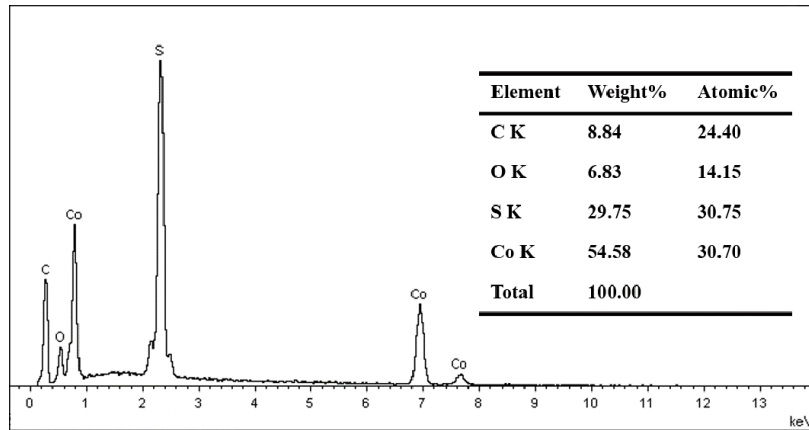

**Fig. S4** EDS spectrum of the MWCNT@a-C@Co<sub>9</sub>S<sub>8</sub> nanocomposite.

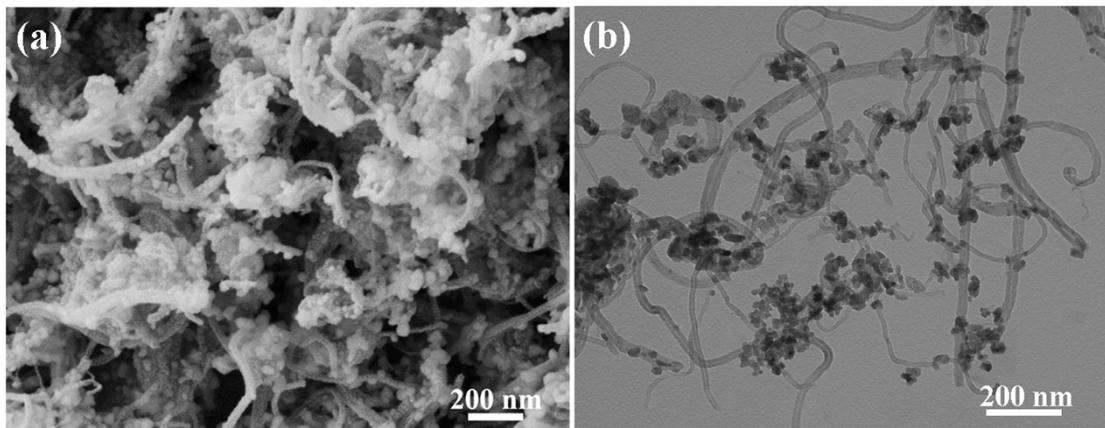

**Fig. S5** (a) SEM and (b) TEM images of the MWCNT@Co<sub>9</sub>S<sub>8</sub> nanocomposite obtained without the hydrothermal treatment by glucose.

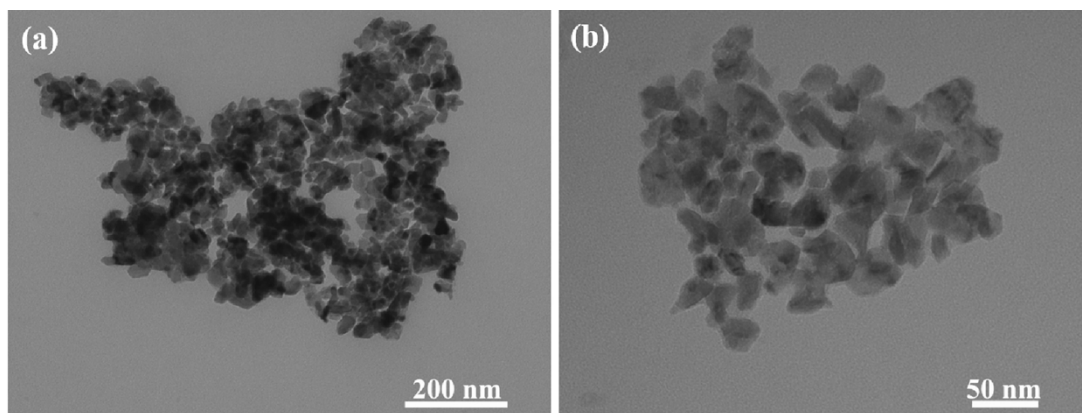

**Fig. S6** (a) SEM image and (b) TEM image of Co<sub>9</sub>S<sub>8</sub> nanoparticles.

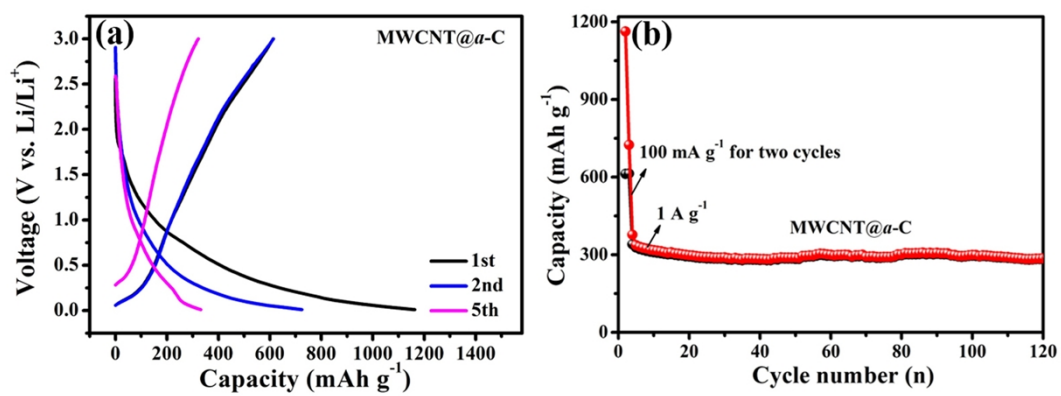

**Fig. S7** (a) Galvanostatic discharge/charge profiles and (b) cycling performance of MWCNT@a-C at 1 A g<sup>-1</sup>(the electrode was first cycled at 100 mA g<sup>-1</sup> for two cycles).

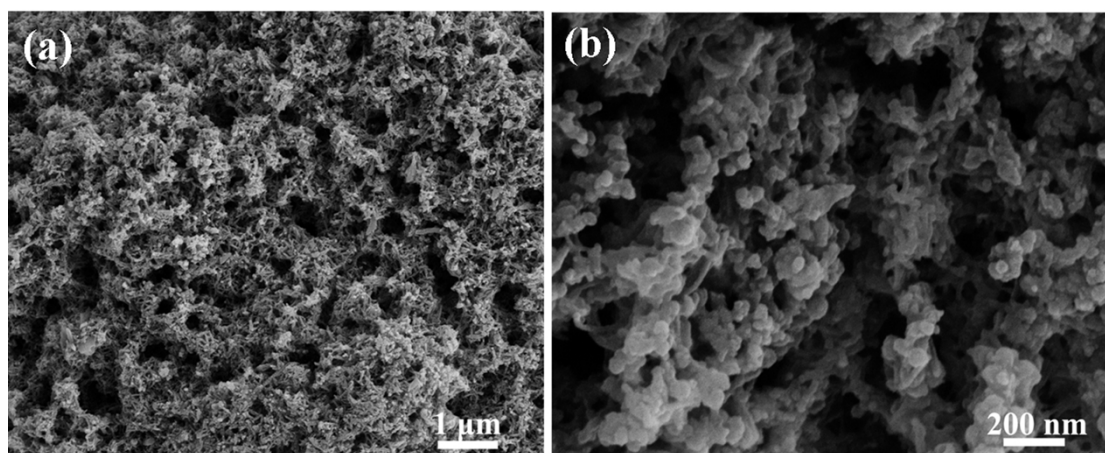

**Fig. S8** (a) and (b) SEM images of MWCNT@a-C@Co<sub>9</sub>S<sub>8</sub> nanocomposites electrode after 50 cycles.

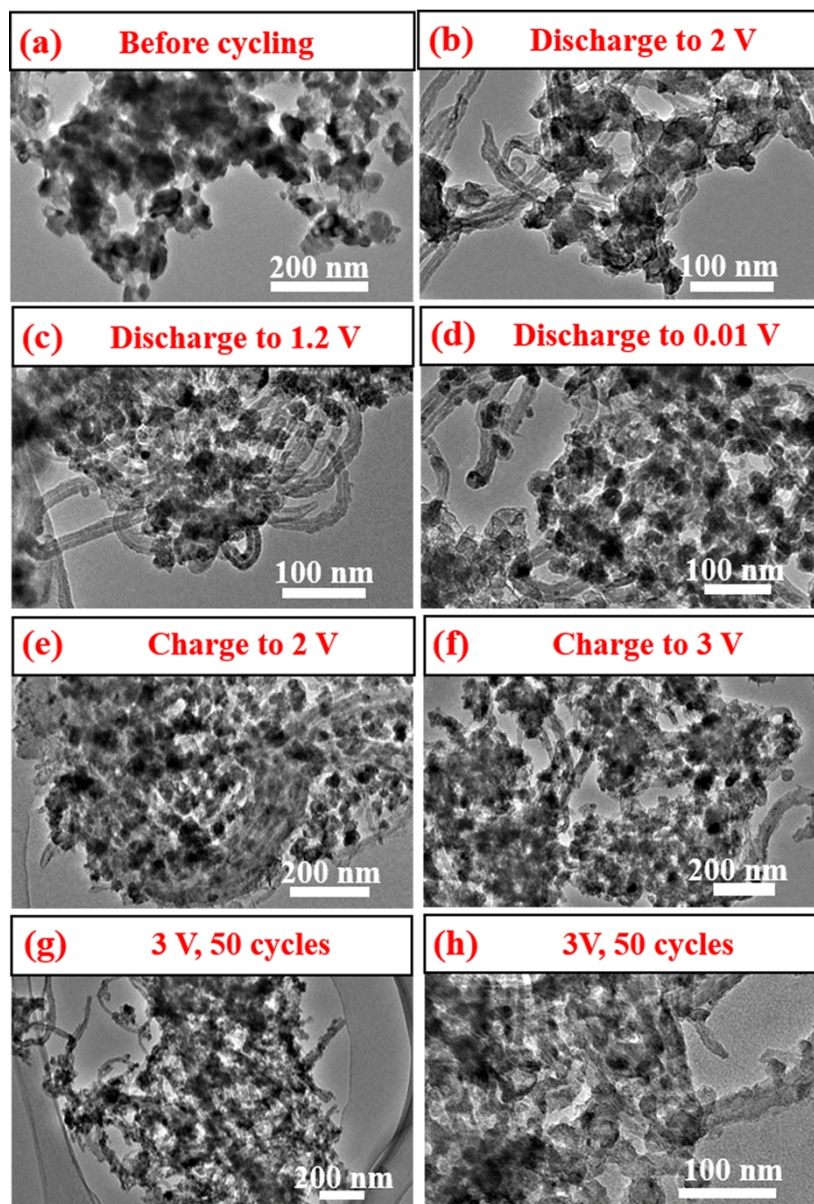

**Fig. S9** TEM images of the anode material at different depth of discharge (b-d) and state of charge (e,f). (a) before the cycling, (b-d) first discharge to 2.0, 1.2 or 0.01 V, (e, f) first charge to 2 or 3 V, (g, h) 3 V after 50 cycles.

**Table S1.** The comparison of cycling performances of some reported cobalt sulfide nanocomposites.

| Materials                                                          | Current Density (mA g <sup>-1</sup> ) | Cycle Number             | Capacity (mAh g <sup>-1</sup> ) | Ref.            |
|--------------------------------------------------------------------|---------------------------------------|--------------------------|---------------------------------|-----------------|
| Spherical CoS <sub>2</sub> @Carbon                                 | 0.2 mA cm <sup>-2</sup>               | 50                       | 440                             | 19              |
| Cobalt Sulfides/Graphene Nanocomposite                             | 100                                   | 50                       | 950                             | 21              |
| CoS <sub>2</sub> /RGO Nanocomposites                               | 100                                   | 50                       | 640                             | 22              |
| Graphene Oxide/Cobalt Sulfide                                      | 200                                   | 150                      | 994                             | 23              |
| Graphene-Wrapped CoS Nanoparticles                                 | 625                                   | 100                      | <500                            | 20              |
| C@Co <sub>9</sub> S <sub>8</sub> Nanodandelions                    | 1000                                  | 50                       | 520                             | 18              |
| C@Co <sub>9</sub> S <sub>8</sub> Nanoparticles                     | 1000                                  | 50                       | 338                             | 18              |
| CoS sheets/Graphene                                                | 1178<br>1767                          | 200                      | ~ 470<br>~ 391                  | 24              |
| <b>MWCNT@<i>a</i>-C@Co<sub>9</sub>S<sub>8</sub> Nanocomposites</b> | <b>1000</b><br><b>2000</b>            | <b>120</b><br><b>700</b> | <b>662</b><br><b>1065</b>       | <b>Our work</b> |
